# Supplementary material for: Benefits of Insect Pollination in Brassicaceae: A Meta-Analysis of Self-Compatible and Self-Incompatible Crop Species
Source: MDPI journal article supplement (doi:10.3390/agriculture12040446), 2022-03-23
Supplement: s1 [file s1]

## **Benefits of insect pollination in cultivated Brassicaceae**

Francisco Rubén Badenes-Perez

Instituto de Ciencias Agrarias, Consejo Superior de Investigaciones Científicas, 28006

Madrid, Spain

Corresponding author, e-mail: [fr.badenes@csic.es](mailto:fr.badenes@csic.es)

**Table S1.** Studies reporting on insect pollination and yield parameters in *Brassica carinata*, *Camelina sativa*, *Eruca sativa*, and *Sinapis alba*; n/a = information not available.

| Plant              | Beneficial effect of insect pollination                                                                                                           | No effect of insect pollination           | Comparison taken in this review                  | Country | References                  |
|--------------------|---------------------------------------------------------------------------------------------------------------------------------------------------|-------------------------------------------|--------------------------------------------------|---------|-----------------------------|
| <i>B. carinata</i> | Increase in seed yield (kg/ha) and number of seeds/silique. Cultivar n/a                                                                          | No significant increase in silique length | Open vs. caged inflorescences                    | India   | (Sihag 1986)                |
|                    | Increase in seed yield (kg/ha). Cultivar n/a                                                                                                      |                                           | Added vs. not added honeybee hives               | US      | (Stiles et al. 2019)        |
| <i>C. sativa</i>   | Increase in seed weight/open flower, silique set, number of seeds/silique, and number of seeds/open flower. Cultivars Ligena, Celine, and Calena. |                                           | Open pollination vs. bagged for insect exclusion | Germany | (Groeneveld and Klein 2014) |

|                  |                                                                                                                                                    |                                                  |        |                               |
|------------------|----------------------------------------------------------------------------------------------------------------------------------------------------|--------------------------------------------------|--------|-------------------------------|
| <i>E. sativa</i> | Increase in seed yield (kg/ha),<br>seed weight/plant, number of<br>siliques/plant, number of<br>seeds/silique, and silique<br>length. Cultivar n/a |                                                  | India  | (Sihag 1986)                  |
| <i>S. alba</i>   | Increase in seed production<br>(number of seeds/branch<br>divided by number of<br>flowers/branch) and seed<br>germination. Wild<br>population      | Open vs. bagged plants<br>to exclude pollinators | Israel | (Gibson-Forty et<br>al. 2021) |
|                  | Increase in number of<br>seeds/silique and number of<br>seeds/open flower. Cultivar<br>n/a                                                         | No significant<br>increase in silique<br>length  | India  | (Sihag 1986)                  |

**Table S2.** Studies reporting on insect pollination and yield parameters in *Brassica juncea*; n/a = information not available.

| <b>Beneficial effect of insect pollination</b>                                                                            | <b>No effect of insect pollination</b>                                                         | <b>Comparison taken in this review</b>                    | <b>Country</b> | <b>References</b>     |
|---------------------------------------------------------------------------------------------------------------------------|------------------------------------------------------------------------------------------------|-----------------------------------------------------------|----------------|-----------------------|
| Increase in seed yield (q/ha), number of siliques/plant, number of seeds/silique, and weight of 1,000 seeds. Cultivar n/a |                                                                                                | Open vs. caged plants                                     | India          | (Mahadik et al. 2019) |
| Increase in seed yield (t/ha). Cultivar n/a                                                                               | No effect on seed germination, weight of 1,000 seeds, oil content (%), and protein content (%) | Open vs. covered plants (with net) to exclude pollinators | Bangladesh     | (Mandal et al. 2018)  |

|                                                                                                                                                                                                            |                                                             |       |                        |
|------------------------------------------------------------------------------------------------------------------------------------------------------------------------------------------------------------|-------------------------------------------------------------|-------|------------------------|
| Increase in silique set, number of seeds/silique, and weight of 1,000 seeds. Cultivar n/a                                                                                                                  | Open vs. caged plants                                       | India | (Devi and Sharma 2018) |
| Increase in silique set, number of seeds/silique, and weight of 1,000 seeds. Cultivar n/a                                                                                                                  | Open vs. caged plots                                        | India | (Devi et al. 2017)     |
| Increase in seed yield (q/ha), number of siliques/plant, silique length, silique set, number of seeds/silique, weight of 1,000 seeds, germination, seed vigor, and oil content. Cultivar RH 0749, type n/a | Open vs. caged with honeybees vs. caged without pollinators | India | (Nagpal et al. 2017)   |
| Increase in seed yield/plant (g) with increased honeybee visits.                                                                                                                                           | Honey bee visits/plant                                      | India | (Maity et al. 2014)    |

Cultivars: parental lines of  
hybrid NRCHB506

|                                                           |  |                                                                      |       |                            |
|-----------------------------------------------------------|--|----------------------------------------------------------------------|-------|----------------------------|
| Increase in numbers of<br>siliques/plant and silique set. |  | Open vs. caged<br>with honeybees vs.<br>caged without<br>pollinators | India | (Goswami and Khan<br>2014) |
|-----------------------------------------------------------|--|----------------------------------------------------------------------|-------|----------------------------|

Average of 7 different cultivars  
(Kranti, Varuna, Margold,  
Vardan, Vaibhav, EC399312  
and EC399313), type n/a

|                                                                                                                                                                                             |                                                                              |                                                                                                                    |       |                        |
|---------------------------------------------------------------------------------------------------------------------------------------------------------------------------------------------|------------------------------------------------------------------------------|--------------------------------------------------------------------------------------------------------------------|-------|------------------------|
| Increase in oil content (%).                                                                                                                                                                | No significant                                                               | Open natural                                                                                                       | India | (Mahindru et al. 1998) |
| Increase in seeds/silique in<br>intensive pollination compared<br>to natural pollination and caged<br>plants compared to plants under<br>natural pollination. Cultivar RL<br>1359, type n/a | increase in silique<br>setting, weight of<br>1,000 seeds, and<br>germination | pollination vs. open<br>with hives of honey<br>bees (intensive<br>pollination) vs.<br>caged without<br>pollinators |       |                        |

|                                 |                     |                      |       |                  |
|---------------------------------|---------------------|----------------------|-------|------------------|
| Increase in seed yield (kg/ha). |                     | Open natural         | India | (Chand and Singh |
| Cultivar Pusa Bold, type n/a    |                     | pollination vs. open |       | 1995)            |
|                                 |                     | with Indian honey    |       |                  |
|                                 |                     | bee colonies vs.     |       |                  |
|                                 |                     | caged without        |       |                  |
|                                 |                     | pollinators          |       |                  |
| Increase in seed yield (kg/ha), | No significant      | Open vs. caged       | India | (Sihag 1986)     |
| number of siliques/plant, and   | increase in silique | inflorescences       |       |                  |
| number of seeds/silique.        | length              |                      |       |                  |
| Cultivar Prakash, type n/a      |                     |                      |       |                  |

---

**Table S3.** Studies reporting on insect pollination and yield parameters in *Brassica napus*. Except for Sihag et al., the references are from the year 2000 onwards; n/a = information not available.

| <b>Beneficial effect of insect pollination</b>                                                                                                   | <b>No effect and negative effect of insect pollination</b>                                            | <b>Comparison taken</b>                                          | <b>Country</b> | <b>References</b>      |
|--------------------------------------------------------------------------------------------------------------------------------------------------|-------------------------------------------------------------------------------------------------------|------------------------------------------------------------------|----------------|------------------------|
| Increase in seed yield (kg/ha), number of seeds/m <sup>2</sup> , and number of seeds/silique. Cultivar Rivette, open-pollinated                  | No effect on seed weight (of 100 seeds), number of siliques/m <sup>2</sup> , and above-ground biomass | Beehive vs. pollinator-exclusion tents                           | Uruguay        | (Mazzilli et al. 2020) |
| Increase in seed biomass (g/plant), decrease in number of flower-abscission scars, and shorter growing season in both open-pollinated and hybrid |                                                                                                       | With vs. without insect pollination ( <i>Bombus terrestris</i> ) | Canada         | (Adamidis et al. 2019) |



varieties. Cultivar names not mentioned (8 open-pollinated and 15 hybrid cultivars)

|                                                                                            |                                                                                               |                                                                       |        |                       |
|--------------------------------------------------------------------------------------------|-----------------------------------------------------------------------------------------------|-----------------------------------------------------------------------|--------|-----------------------|
| Increase in silique weight and number of seeds/silique.                                    | No effect on weight of 1,000 seeds                                                            | Open vs. covered inflorescences                                       | Brazil | (Fuzaro et al. 2018)  |
| Hybrids Hyola 61 and Hyola 433                                                             |                                                                                               |                                                                       |        |                       |
| Increase in number of seeds/silique.                                                       | No effect on yield, number of seeds/plant, number of silique/plant, and weight of 1,000 seeds | Open ambient pollination vs. excluded pollination with polythene mesh | UK     | (Garratt et al. 2018) |
| Increase in seed yield, silique set, and seed mass adjusted to plant biomass. 28 different | Decrease in number of seeds/silique and no                                                    | Variable pollinator abundance                                         | France | (Perrot et al. 2018)  |

|                                                                                                                                                                            |                                                                                                                                             |                                                        |        |                         |
|----------------------------------------------------------------------------------------------------------------------------------------------------------------------------|---------------------------------------------------------------------------------------------------------------------------------------------|--------------------------------------------------------|--------|-------------------------|
| cultivars. Cultivar names not mentioned (88.7% restored hybrid cultivars and 11.1% conventional cultivars)                                                                 | significant effect on seed weight                                                                                                           |                                                        |        |                         |
| Increase in yield (total seed weight/plant), seed weight/vegetative biomass ratio, number of seeds/silique, and silique set. Cultivar type Yangguang 2009, open-pollinated | No effect on number of siliques/plant. Reduction in number of flowers/plant, 1,000-seed weight, and above-ground biomass excluding siliques | Open vs. closed cages                                  | China  | (Zou et al. 2017b, a)   |
| Increase in seed yield (t/ha) only in open-pollinated cultivars Galileo, Epure, and Alpaga                                                                                 | No significant increase in seed yield (t/ha) in hybrid cultivars                                                                            | Open pollination vs. open pollination with addition of | Sweden | (Lindström et al. 2016) |

|                                                                                                        |                                                                                      |                                                          |             |                            |
|--------------------------------------------------------------------------------------------------------|--------------------------------------------------------------------------------------|----------------------------------------------------------|-------------|----------------------------|
|                                                                                                        | Excalibur, Compass, and Expower                                                      | beehives (extra pollinators)                             |             |                            |
| Cultivar n/a                                                                                           | No effect on seed weight/seed. No effect on numbers of seeds/silique and seeds/plant | Open vs. bagged (pollinator exclusion)                   | Ethiopia    | (Samnegård et al. 2016)    |
| Increase in yield (total seed weight) and number of flowers/plant. Cultivar Petranova, open-pollinated | No effect on above-ground biomass                                                    | Open vs. pollinator-exclusion cover                      | Netherlands | (van Gils et al. 2016)     |
| Increase in yield (t/ha) and oil content (g/kg). Hybrid variety Visby                                  |                                                                                      | Caged plants either with or without <i>B. terrestris</i> | Switzerland | (Sutter and Albrecht 2016) |

|                                                                                                                                                                                                                                           |                                                                                |                                             |        |                      |
|-------------------------------------------------------------------------------------------------------------------------------------------------------------------------------------------------------------------------------------------|--------------------------------------------------------------------------------|---------------------------------------------|--------|----------------------|
| Increase in seed yield (g/plant and kg/fed), number of siliques/plant, number of seeds/silique, weight of 1,000 seeds, and germination. Cultivar Serw4, open-pollinated                                                                   |                                                                                | Open vs. caged plants                       | Egypt  | (Kamel et al. 2015)  |
| Increase in yield (g/m <sup>2</sup> ) only in open-pollinated cultivar Catalina. Increase in oil content, seeds/silique and number of siliques/m <sup>2</sup> in open-pollinated (Catalina) and in hybrid cultivars (Excalibur, PR45D01). | No yield increase (g/m <sup>2</sup> ) in hybrid cultivars (Excalibur, PR45D01) | Open vs. closed cages excluding pollinators | Italy  | (Marini et al. 2015) |
| Increase in silique length, seed mass/silique, and silique set.                                                                                                                                                                           | Non-significant increase in silique mass                                       | Shade houses with and without               | Brazil | (Witter et al. 2015) |

|                                                                                                                                                  |                                                                              |                                                                                              |        |                         |
|--------------------------------------------------------------------------------------------------------------------------------------------------|------------------------------------------------------------------------------|----------------------------------------------------------------------------------------------|--------|-------------------------|
| Increase in silique mass and number of seeds/silique only with the pollinators <i>A. mellifera</i> and <i>Plebeia emerina</i> . Hybrid Hyola 61. | and number of seeds/silique with the pollinator <i>Tetragonisca fiebrigi</i> | bee colonies of three types ( <i>A. mellifera</i> , <i>P. emerina</i> , <i>T. fiebrigi</i> ) |        |                         |
| Increase in yield (seed weight/plant). Hybrids Excalibur and Compass                                                                             |                                                                              | Variable pollinator visitation                                                               | Sweden | (Bartomeus et al. 2015) |
| Increase in seed yield (kg/ha), seed mass/plant, seed mass/silique, and number of seeds/silique. Hybrids Hyola 61 and Hyola 433                  | Reduction or no effect on weight of 1,000 seeds, depending on sowing date    | Open vs. caged with or without beehives                                                      | Brazil | (Chambó et al. 2014)    |
| Increase in number of seeds/silique for Hyola 61 in one                                                                                          | No effect on number of seeds/silique in Hyola                                | Open vs. covered flowers                                                                     | Brazil | (Blochtein et al. 2014) |

|                                   |                          |                   |         |                       |
|-----------------------------------|--------------------------|-------------------|---------|-----------------------|
| location. Increase in total seeds | 433 and in Hyola 61      |                   |         |                       |
| wegith/silique for Hyola 61 in    | (another location); no   |                   |         |                       |
| another location. Hybrids Hyola   | effect on total seed     |                   |         |                       |
| 61 and Hyola 420                  | weight/silique in Hyola  |                   |         |                       |
|                                   | 433 and in Hyola 61      |                   |         |                       |
|                                   | (another location).      |                   |         |                       |
| Increase in silique weight,       | No significant effect on | Caged plants with | UK      | (Garratt et al. 2014) |
| number of seeds/silique, and      | seed weight              | pollinators vs.   |         |                       |
| silique set (%). Open-pollinated  |                          | caged plants      |         |                       |
| cultivar Heros                    |                          | without           |         |                       |
|                                   |                          | pollinators       |         |                       |
| Increase in seed yield (g/plant), | Decrease in weight of    | Open vs. open     | Germany | (Hudewenz et al.      |
| silique set, and number of        | 1,000 seeds              | and additional    |         | 2014)                 |
| seeds/silique. Open-pollinated    |                          | hand pollination  |         |                       |
|                                   |                          | vs. bagging to    |         |                       |

|                                  |                        |                  |          |                       |
|----------------------------------|------------------------|------------------|----------|-----------------------|
| cultivar Sherlock and hybrids    |                        | preven insect or |          |                       |
| Traviata, Treffer, and Visby     |                        | wind pollination |          |                       |
| Increase in the number of        | No effect on weight of | Open next to bee | Serbia   | (Nedić et al. 2013)   |
| siliques/plant and number of     | 1,000 seeds            | hives vs. caged  |          |                       |
| seeds/silique. Cultivar KWC      |                        |                  |          |                       |
| “Triangle”, type n/a             |                        |                  |          |                       |
| Increase in number of            |                        | Open vs. covered | Pakistan | (Shakeel and          |
| siliques/plant, number of        |                        | with nylon cloth |          | Inayatullah 2013)     |
| seeds/silique, and weight of 100 |                        |                  |          |                       |
| seeds. Cultivars Ganyou and      |                        |                  |          |                       |
| Oscar, type n/a                  |                        |                  |          |                       |
| Increase in number of            |                        | Open vs.         | Ireland  | (Stanley et al. 2013) |
| seeds/silique and seed           |                        | exclusion cover  |          |                       |
| weight/silique. Cultivars        |                        |                  |          |                       |

Castille (open-pollinated) and  
Excalibur (hybrid)

|                                                                                                                                                                                            |                                                                                                                              |                                                                                                                                          |         |                           |
|--------------------------------------------------------------------------------------------------------------------------------------------------------------------------------------------|------------------------------------------------------------------------------------------------------------------------------|------------------------------------------------------------------------------------------------------------------------------------------|---------|---------------------------|
| Increase in seed weight/plant,<br>weight of 1,000 seeds, number<br>of seeds/plant, oil content (%),<br>and market value (Euro<br>cents/plant). Cultivar SW<br>Stratos™, open-pollinated    | No effect on the<br>number of flowers/plant<br>and number of<br>seeds/plant; reduction<br>of chlorophyll content<br>in seeds | Open vs.<br>pollinator-<br>exclusion cover                                                                                               | Sweden  | (Bommarco et al.<br>2012) |
| Increase in seed yield (g/m <sup>2</sup> ),<br>number of seeds/silique, and<br>silique set in MSL 501 C line<br>(male sterile). MSL 501 B<br>(male fertile) line in cage with<br>MSL 501 C | No effect on weight of<br>1,000 seeds                                                                                        | Caged with<br><i>Osmia rufa</i> ,<br><i>Eristalis tenax</i> ,<br>and <i>Episyrphus</i><br><i>balteatus</i> and<br>without<br>pollinators | Germany | (Jauker et al. 2012)      |



|                                                                                                           |                                                                       |                                                                                          |          |                             |
|-----------------------------------------------------------------------------------------------------------|-----------------------------------------------------------------------|------------------------------------------------------------------------------------------|----------|-----------------------------|
| Increase in seed weight/silique and number of seeds/silique. Hybrid Hyola 432                             | No effect on the number of flowers/plant and number of siliques/plant | Open vs. pollinator exclusion cover                                                      | Brazil   | (De Souza Rosa et al. 2011) |
| Increase in silique weight, number of seeds/silique, and silique length. Cultivar Bulbul, open-pollinated |                                                                       | Open vs. caged                                                                           | Pakistan | (Ali et al. 2011)           |
| Increase in yield (t/ha), number of seeds/silique, and number of siliques/plant. Hybrid Artus             | Decrease in weight of 1,000 seeds                                     | Open vs. partial pollinator exclusion (without pollinators of size $\geq$ honeybees) vs. | Chile    | (Araneda Durán et al. 2010) |

|                                                                                                                                                                                                                                                                                                       |                                                           |                                                                                                       |         |                              |
|-------------------------------------------------------------------------------------------------------------------------------------------------------------------------------------------------------------------------------------------------------------------------------------------------------|-----------------------------------------------------------|-------------------------------------------------------------------------------------------------------|---------|------------------------------|
|                                                                                                                                                                                                                                                                                                       |                                                           | total pollinator<br>exclusion                                                                         |         |                              |
| Increase in number of<br>seeds/silique. Cultivar<br>Licosmos, open-pollinated                                                                                                                                                                                                                         | No differences in<br>weight of individual<br>seeds.       | Caged, no<br>hoverflies vs.<br>hoverflies                                                             | Germany | (Jauker and Wolters<br>2008) |
| Increase in weight of seeds/m <sup>2</sup> ,<br>number of seeds/m <sup>2</sup> , silique set,<br>number of siliques/plant,<br>number of seeds/silique, weight<br>of seeds/silique, and weight of<br>seeds/plant. Open-pollinated<br>cultivar LG3235RR and hybrids<br>Hyola 357RR and Invigor<br>247LL | No differences or<br>decrease in weight of<br>1,000 seeds | Addition of<br>beehives vs.<br>caged (or in the<br>field with no<br>addition of<br>beehives or caged) | Canada  | (Sabbahi et al. 2005)        |

|                                                                                                                                                                                                                                               |                                                                                                                                                                           |                                                           |                  |                                  |
|-----------------------------------------------------------------------------------------------------------------------------------------------------------------------------------------------------------------------------------------------|---------------------------------------------------------------------------------------------------------------------------------------------------------------------------|-----------------------------------------------------------|------------------|----------------------------------|
| <p>Increase in seed yield (g/m<sup>2</sup>), number of siliques/m<sup>2</sup>, and yield of oil (g/m<sup>2</sup>) in the treatment closer (&lt;100 m) to apiaries compared to those further away (≥300 m). Cultivar Karoo, type n/a</p>       |                                                                                                                                                                           | <p>Plost located at different distances from apiaries</p> | <p>Australia</p> | <p>(Manning and Wallis 2005)</p> |
| <p>Increase in the number of seeds/silique, number of seeds/plant dry weight, and seed weight/plant dry weight in both lines Male-sterile line Express (MSL) and Male-fertile line Express (MFL). Increase in number of seeds/plant, seed</p> | <p>Decrease in weight of 1,000 seeds in both lines MSL and MFL. Decrease in plant dry weight in MSL. No effect on number of seeds/plant, seed weight/plant, number of</p> | <p>No pollinator vs. high pollinator density (caged)</p>  | <p>Germany</p>   | <p>(Steffan-Dewenter 2003)</p>   |

|                                   |                           |                 |        |                 |
|-----------------------------------|---------------------------|-----------------|--------|-----------------|
| weight/plant, and number of       | siliques/plant, and plant |                 |        |                 |
| siliques/plant only in MSL line   | dry weight in MFL         |                 |        |                 |
| Cultivar CTC-4, open-pollinated   | No significant effect on  | Open vs. bagged | Brazil | (Mussury and    |
|                                   | silique length, seeds     | inflorescences  |        | Fernandes 2000) |
|                                   | size, number of           |                 |        |                 |
|                                   | seeds/plant, weight of    |                 |        |                 |
|                                   | 10 seeds, and             |                 |        |                 |
|                                   | germination               |                 |        |                 |
| Increase in number of             |                           | Open vs. caged  | India  | (Sihag 1986)    |
| seeds/silique and silique length. |                           | inflorescences  |        |                 |
| Cultivar type n/a                 |                           |                 |        |                 |

---

**Table S4.** Studies reporting on insect pollination and yield parameters in *Brassica oleracea*; n/a = information not available.

| Beneficial effect of insect<br>pollination                                                                                                                                       | No effect of insect<br>pollination | Comparison taken                                     | Country | References              |
|----------------------------------------------------------------------------------------------------------------------------------------------------------------------------------|------------------------------------|------------------------------------------------------|---------|-------------------------|
| Increase in yield (quintal/ha),<br>number of siliques/plant,<br>number of seeds/silique, and<br>weight of 1,000 seeds. Var.<br><i>botrytis</i> , cultivar Sel-1, type<br>n/a     |                                    | Open vs. caged plants                                | India   | (Sharma et al. 2013)    |
| Increase in silique set (%),<br>number of seeds/silique,<br>weight of 100 seeds, and<br>seed germination. Var.<br><i>botrytis</i> , cultivar Kathmandu<br>Local, open-pollinated |                                    | Open/caged with beehive<br>vs. bagged inflorescences | Nepal   | (Verma and Partap 1994) |

|                                                                                                                                                                             |                                                  |                                                      |       |                         |
|-----------------------------------------------------------------------------------------------------------------------------------------------------------------------------|--------------------------------------------------|------------------------------------------------------|-------|-------------------------|
| Increase in silique set (%),<br>number of seeds/silique,<br>weight of 100 seeds, and<br>germination. Var. <i>capitata</i> ,<br>cultivar Pride of India, open-<br>pollinated |                                                  | Open/caged with beehive<br>vs. bagged inflorescences | Nepal | (Verma and Partap 1994) |
| Increase in number of<br>seeds/silique and weight of<br>100 seeds. Var. <i>botrytis</i> ,<br>cultivars Snowball-16, K-1,<br>Sel-1, Sel-12, and Sel-25,<br>type n/a          | No significant<br>increase in silique<br>set (%) | Open vs. bagged/caged<br>floral buds                 | India | (Kumar et al. 1988)     |
| Increase in seed yield<br>(kg/ha), number of<br>siliques/plant, number of                                                                                                   |                                                  | Open vs. caged<br>inflorescences                     | India | (Sihag 1986)            |

seeds/silique, seed

weight/plant, and silique

length. Var. *botrytis*,

cultivar n/a

Increase in seed yield (g/5

plants), silique set (%),

silique length, number of

seeds/silique, weight of

1,000 seeds, and

germination. Var. *botrytis*

cultivar Hissar-1, type n/a

Increase in silique set (%),

number of seeds/silique, and

weight of 1 seed. Var.

*botrytis* cultivar n/a

Shorter (12.5 m) to

longer (200 m) distances

from bee hives

India

(Tewari and Singh 1983)

Open vs. bagged

inflorescences

India

(Varma and Joshi 1983)

**Table S5.** Studies reporting on insect pollination and yield parameters in *Brassica rapa* (synonymous of *Brassica campestris*); n/a = information not available.

| <b>Beneficial effect of insect pollination</b>                                                                                                 | <b>No effect of insect pollination</b>        | <b>Comparison</b>                      | <b>Country</b> | <b>References</b>        |
|------------------------------------------------------------------------------------------------------------------------------------------------|-----------------------------------------------|----------------------------------------|----------------|--------------------------|
| Increase in yield (weight of seeds/plant). Variety Toria, cultivar n/a, open-pollinated                                                        |                                               | Open vs. bagged to exclude pollinators | Nepal          | (Devkota et al. 2021)    |
| Increase in number of siliques/plant, silique set, seeds/silique, seed diameter, and weight of 100 seeds. Variety Toria, cultivar and type n/a | No significant effect on silique length       | Open vs. enclosed plants with netting  | Nepal          | (Subedi and Subedi 2019) |
| Increase in yield (g/plant), seeds/silique, and siliques/raceme. Cultivar n/a                                                                  | No effect on weight of 100 seeds. Decrease in | Open vs. bagged to exclude pollinators | Finland        | (Toivonen et al. 2019)   |



|                                                                                                                                                                          |                                                                                                                                        |                                                                                                               |       |                            |
|--------------------------------------------------------------------------------------------------------------------------------------------------------------------------|----------------------------------------------------------------------------------------------------------------------------------------|---------------------------------------------------------------------------------------------------------------|-------|----------------------------|
|                                                                                                                                                                          | number of<br>racemes/plant                                                                                                             |                                                                                                               |       |                            |
| Increase in seed yield (g/m <sup>2</sup> ),<br>number of siliques/raceme, and<br>number of seeds/silique. Variety<br>Toria, open-pollinated                              | In one of the two<br>sites the increase in<br>seed yield (g/m <sup>2</sup> )<br>and number of<br>seeds/silique were<br>not significant | Honeybee hives close<br>to the field ( $\leq 100$ m)<br>vs. no honeybee hives<br>close to the field (1<br>km) | India | (Stanley et al. 2017)      |
| Increase in seed yield (kg/ha),<br>weight of 1,000 seeds, number<br>of siliques/plant, seeds/silique,<br>and silique length. Variety<br>Toria, cultivar RSPT-1, type n/a |                                                                                                                                        | Open/honeybee<br>colonies vs.<br>pollinators excluded<br>with insect-proof nets<br>over plants                | India | (Sharma and Abrol<br>2014) |

|                                                                                                                                                                                                                                       |                                                             |                                                                                                             |       |                               |
|---------------------------------------------------------------------------------------------------------------------------------------------------------------------------------------------------------------------------------------|-------------------------------------------------------------|-------------------------------------------------------------------------------------------------------------|-------|-------------------------------|
| Increase in seed yield (t/ha),<br>number of siliques/plant,<br>number of seeds/silique, silique<br>length, and harvest index (seed<br>weight/aboveground plant<br>biomass weight). Variety Toria,<br>cultivar Pragati open-pollinated | Decrease in plant<br>height and number<br>of branches/plant | Open vs. caged (with<br>pollinators <i>A. cerana</i><br>and <i>A. mellifera</i> and<br>without pollinators) | Nepal | (Pudasaini and Thapa<br>2014) |
| Increase in weight of 1,000<br>seeds and germination. Variety<br>Toria, cultivar Pragati, open-<br>pollinated                                                                                                                         | Increase in oil<br>content not<br>significant               | Open vs. caged (with<br>pollinators <i>A. cerana</i><br>and <i>A. mellifera</i> and<br>without pollinators) | Nepal | (Pudasaini et al. 2014)       |
| Increase in weight of 100 seeds,<br>number of seeds/silique, and<br>silique set                                                                                                                                                       |                                                             | Open vs. enclosed<br>with insect mesh net                                                                   | India | (Tara and Sharma<br>2010)     |

|                                                                                                                                               |                                            |                                          |           |                             |
|-----------------------------------------------------------------------------------------------------------------------------------------------|--------------------------------------------|------------------------------------------|-----------|-----------------------------|
| Increase in seed weight/plant,<br>number of siliques/plant,<br>number of seeds/silique,<br>seeds/plant, and germination.                      | No changes in<br>plant height              | Open vs. caged to<br>exclude pollinators | Indonesia | (Atmowidi et al.<br>2007)   |
| Cultivar n/a                                                                                                                                  |                                            |                                          |           |                             |
| Increase in seed weight/plant<br>and number of siliques/plant.                                                                                |                                            | Open vs. caged to<br>exclude pollinators | Pakistan  | (Khan and Chaudhry<br>1995) |
| Var. Sarson, open-pollinated                                                                                                                  |                                            |                                          |           |                             |
| Increase in seed yield (g/plant),<br>number of siliques/plant, silique<br>weight, number of seeds/silique,<br>and number of seeds/plant. Var. | No effect on<br>number of<br>flowers/plant | Open vs. bagged<br>plants                | India     | (Singh and Singh<br>1992)   |
| Toria, open-pollinated                                                                                                                        |                                            |                                          |           |                             |

|                                                                                                                                                                   |                                                           |                                  |       |                      |
|-------------------------------------------------------------------------------------------------------------------------------------------------------------------|-----------------------------------------------------------|----------------------------------|-------|----------------------|
| Increase in silique set,<br>seeds/silique, percentage of<br>healthy seeds, and oil yield<br>(mg/silique). Var. Sarson,<br>cultivar BSH-1, open-pollinated         | Decrease in weight<br>of 100 seeds and<br>oil content (%) | Open vs.<br>bagged/netted plants | India | (Mishra et al. 1988) |
| Increase in seed yield (kg/ha),<br>number of siliques/plant,<br>number of seeds/silique, seed<br>weight/plant, and silique length.<br>Var. Toria, open-pollinated |                                                           | Open vs. caged<br>inflorescences | India | (Sihag 1986)         |

---

**Table S6.** Studies reporting on insect pollination and yield parameters in *Raphanus sativus*; n/a = information not available.

| <b>Beneficial effect of insect<br/>pollination</b>                                                                                                             | <b>No effect of insect<br/>pollination</b> | <b>Comparison</b>                         | <b>Country</b> | <b>References</b>                     |
|----------------------------------------------------------------------------------------------------------------------------------------------------------------|--------------------------------------------|-------------------------------------------|----------------|---------------------------------------|
| Increase in weight of 1,000<br>seeds, number of<br>siliques/plant, number of<br>seeds/silique, silique length,<br>germination, and seed vigor.<br>Cultivar n/a |                                            | Open vs. bagged plants                    | India          | (Jakhar et al. 2014)                  |
| Increase in seed yield (q/ha),<br>number of siliques/plant,<br>number of seeds/silique,                                                                        |                                            | Caged with bees vs.<br>caged without bees | India          | (Chandrashekhara and<br>Sattigi 2009) |

weight of 1,000 seeds, seed  
filling, and seed germination.

Cultivar n/a

|                                                                                                                         |                                                                                                  |                      |       |                      |
|-------------------------------------------------------------------------------------------------------------------------|--------------------------------------------------------------------------------------------------|----------------------|-------|----------------------|
| Increase in seed yield<br>(g/plant), weight of 100<br>seeds, and number of<br>seeds/silique. Cultivar<br>Japanese White | No significant<br>increase in number<br>of siliques/plant,<br>silique length, and<br>germination | Open vs.caged plants | India | (Kapila et al. 2002) |
|-------------------------------------------------------------------------------------------------------------------------|--------------------------------------------------------------------------------------------------|----------------------|-------|----------------------|

|                                                                                                                         |  |                                                                         |       |                         |
|-------------------------------------------------------------------------------------------------------------------------|--|-------------------------------------------------------------------------|-------|-------------------------|
| Increase in weight of 100<br>seeds, number of<br>seeds/silique, silique set, and<br>germination. Cultivar Mino<br>Early |  | Caged with one beehive<br>vs. uncaged in open field<br>without beehives | Nepal | (Partap and Verma 1994) |
|-------------------------------------------------------------------------------------------------------------------------|--|-------------------------------------------------------------------------|-------|-------------------------|

|                                                                                                                           |                                                |                        |       |                         |
|---------------------------------------------------------------------------------------------------------------------------|------------------------------------------------|------------------------|-------|-------------------------|
| Increase in number of seeds/silique and silique set.                                                                      | No significant increase in weight of 100 seeds | Open vs. bagged plants | India | (Verma and Phogat 1994) |
| Cultivar Japanese Long White                                                                                              |                                                |                        |       |                         |
| Increase in seed yield (kg/ha), number of siliques/plant, number of seeds/silique, seed weight/plant, and silique length. |                                                |                        | India | (Sihag 1986)            |
| Cultivar n/a                                                                                                              |                                                |                        |       |                         |

---





**Fig. S1.** Funnel plots corresponding to the meta-analyses of the effect of insect pollination on seed yield in self-compatible (A) and self-incompatible (B) Brassicaceae crops.

**A**

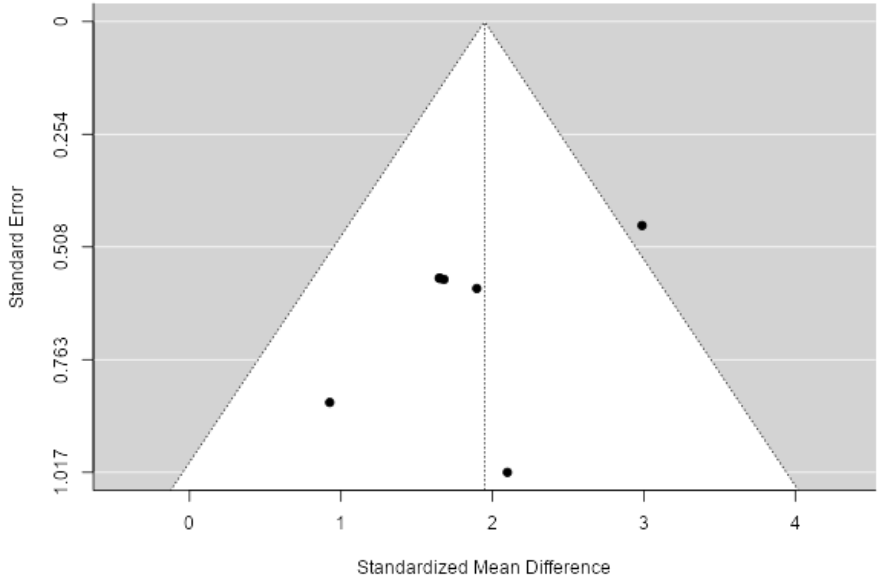

**B**

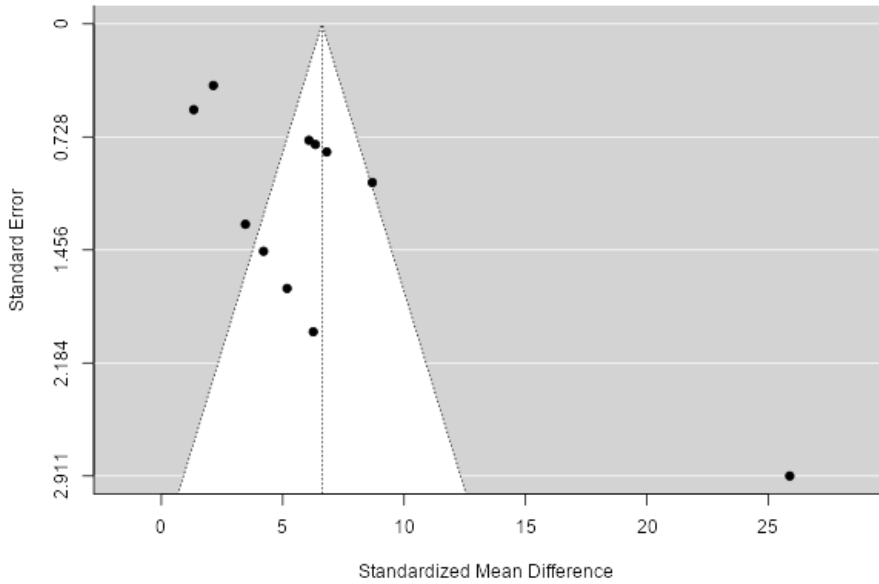

**Fig. S2.** Funnel plots corresponding to the meta-analyses of the effect of insect pollination on weight of seeds in self-compatible (A) and self-incompatible (B) Brassicaceae crops.

**A**

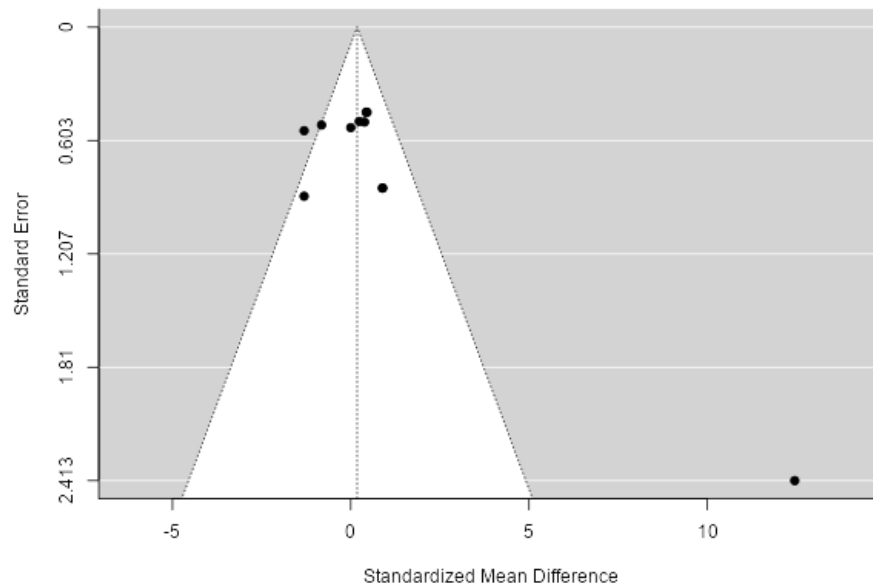

**B**

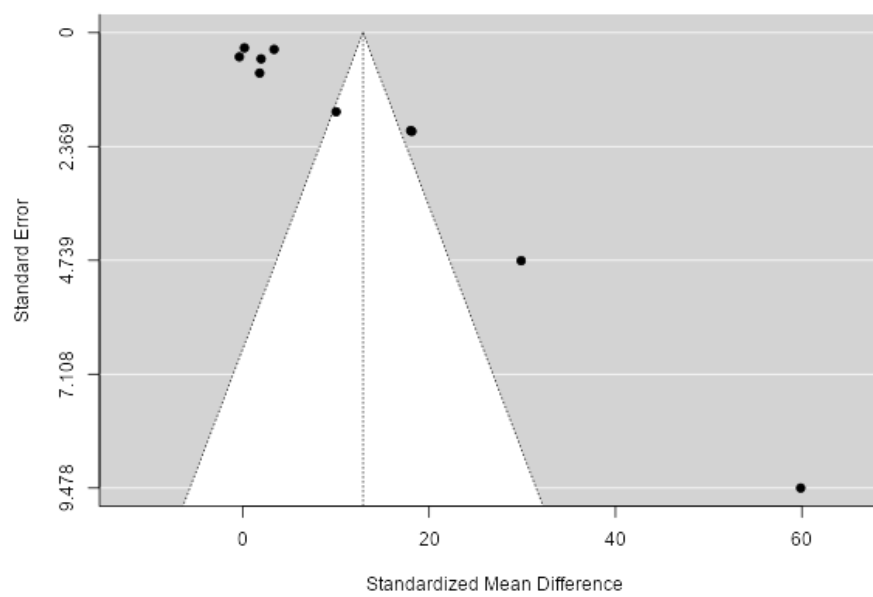

**Fig. S3.** Funnel plots corresponding to the meta-analyses of the effect of insect pollination on silique set in self-compatible (A) and self-incompatible (B) Brassicaceae crops.

**A**

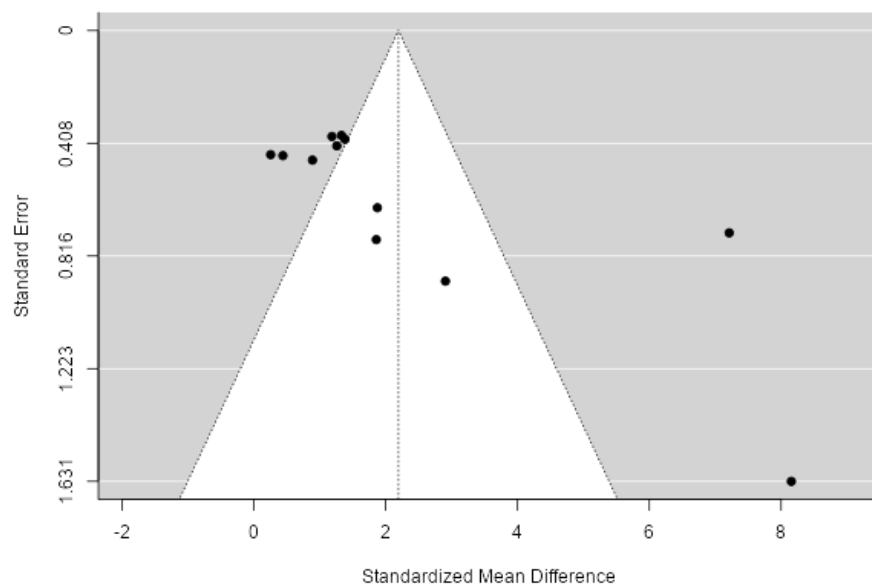

**B**

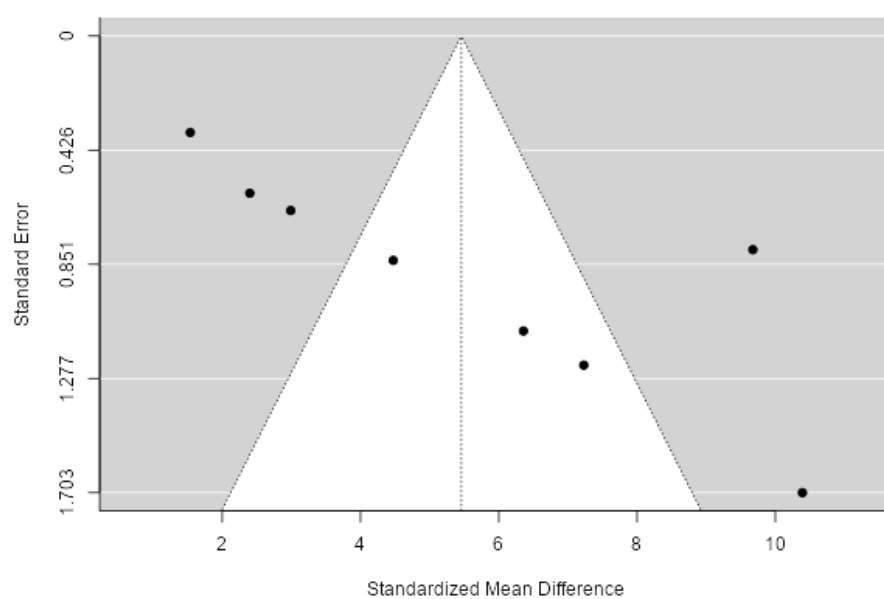

**Fig. S4.** Funnel plots corresponding to the meta-analyses of the effect of insect pollination on the number of siliques per plant or area in self-compatible (A) and self-incompatible (B) Brassicaceae crops.

**A**

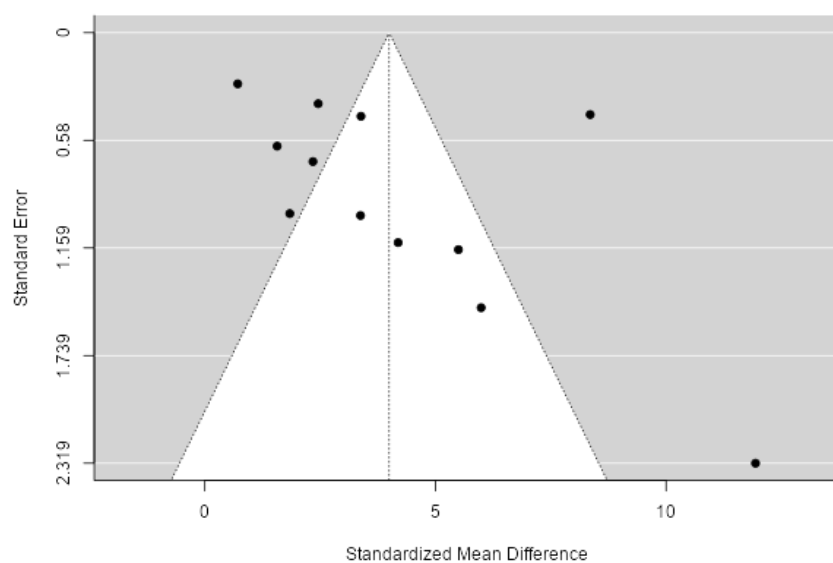

**B**

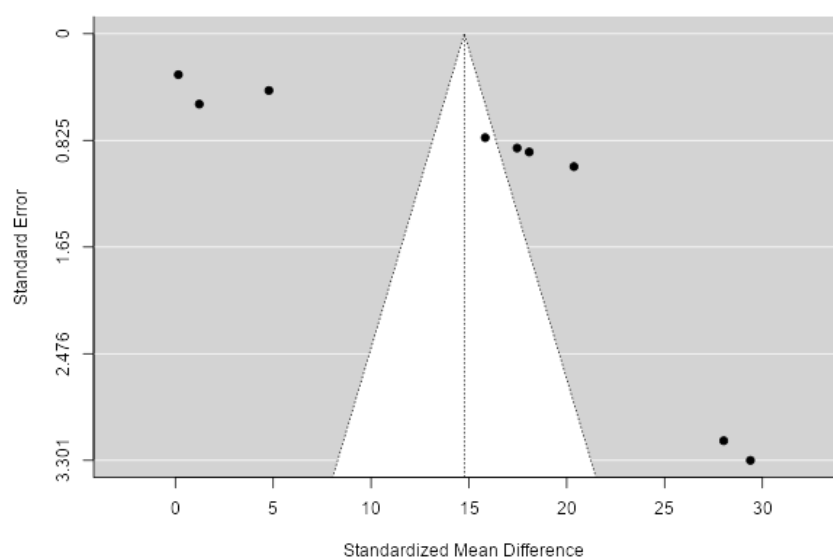

**Fig. S5.** Funnel plots corresponding to the meta-analyses of the effect of insect pollination on the number of seeds per silique or area in self-compatible (A) and self-incompatible (B) Brassicaceae crops.

**A**

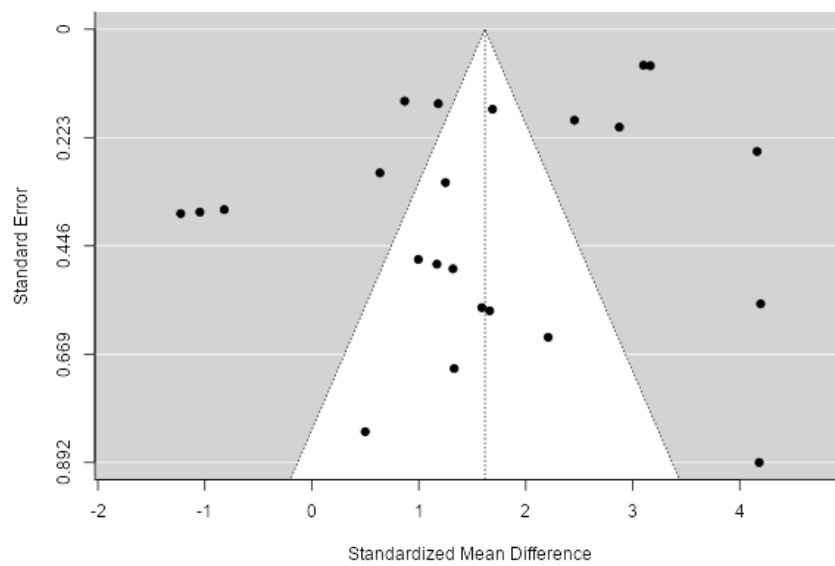

**B**

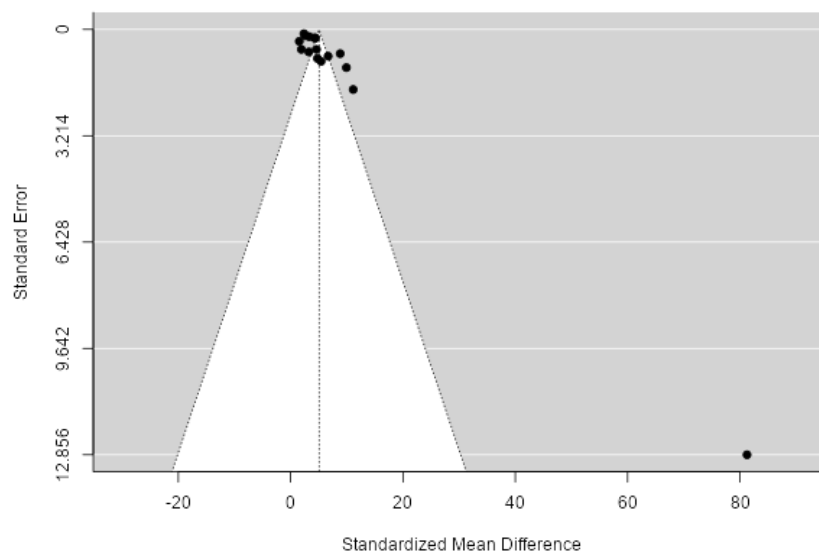

## References

- Adamidis GC, Cartar RV, Melathopoulos AP, et al (2019) Pollinators enhance crop yield and shorten the growing season by modulating plant functional characteristics: A comparison of 23 canola varieties. *Scientific Reports* 9:14208. <https://doi.org/10.1038/s41598-019-50811-y>
- Ali M, Saeed S, Sajjad A, Whittington A (2011) In search of the best pollinators for canola (*Brassica napus* L.) production in Pakistan. *Applied Entomology and Zoology* 46:353–361. <https://doi.org/10.1007/s13355-011-0051-0>
- Araneda Durán X, Breve Ulloa R, Aguilera Carrillo J, et al (2010) Evaluation of yield component traits of honeybee-pollinated (*Apis mellifera* L.) rapeseed canola (*Brassica napus* L.). *Chilean Journal of Agricultural Research* 70:309–314
- Atmowidi T, Buchori D, Manuwoto S, et al (2007) Diversity of pollinator insects in relation to seed set of mustard (*Brassica rapa* L.: Cruciferae). *HAYATI Journal of Biosciences* 14:155–161
- Bartomeus I, Gagic V, Bommarco R (2015) Pollinators, pests and soil properties interactively shape oilseed rape yield. *Basic and Applied Ecology* 16:737–745. <https://doi.org/10.1016/j.baae.2015.07.004>
- Blochtein B, Nunes-Silva P, Halinski R, et al (2014) Comparative study of the floral biology and of the response of productivity to insect visitation in two rapeseed cultivars (*Brassica napus* L.) in Rio Grande do Sul. *Brazilian Journal of Biology* 74:787–794
- Bommarco R, Marini L, Vaissière BE (2012) Insect pollination enhances seed yield, quality, and market value in oilseed rape. *Oecologia* 169:1025–1032. <https://doi.org/10.1007/s00442-012-2271-6>
- Chambó ED, De Oliveira NTE, Garcia RC, et al (2014) Pollination of rapeseed (*Brassica napus*) by africanized honeybees (Hymenoptera: Apidae) on two sowing dates. *Anais da Academia Brasileira de Ciencias* 86:2087–2100. <https://doi.org/10.1590/0001-3765201420140134>
- Chand H, Singh B (1995) Effect of pollination by *Apis cerana* Fabr. on yield of mustard, *Brassica juncea*. *Indian Bee Journal* 57:173–174
- Chandrashekhar GS, Sattigi HN (2009) Influence of bee attractants on bee pollination on seed quality and yield in radish. *Karnataka J Agric Sci* 22:777–780
- De Souza Rosa A, Blochtein B, Lima DK (2011) Honey bee contribution to canola pollination in Southern Brazil. *Sci Agric* 68:255–259

- Devi M, Sharma H, Thakur RK, et al (2017) Diversity of insect pollinators in reference to seed set of mustard (*Brassica juncea* L.). International Journal of Current Microbiology and Applied Sciences 6:2131–2144.  
<https://doi.org/10.20546/ijcmas.2017.607.250>
- Devi M, Sharma HK (2018) Effect of different modes of pollination on seed set of mustard (*Brassica juncea* L.) sown on different sowing dates. Journal of Entomology and Zoology Studies 6:1889–1893
- Devkota K, dos Santos CF, Blochtein B (2021) Higher richness and abundance of flower-visiting insects close to natural vegetation provide contrasting effects on mustard yields. J Insect Conserv 25:1–11. <https://doi.org/10.1007/s10841-020-00279-3>
- Fuzaro L, Xavier NL, Carvalho FJ, et al (2018) Influence of pollination on canola seed production in the Cerrado of Uberlândia, Minas Gerais State, Brazil. Acta Scientiarum Agronomy 40:e39315
- Garratt MPD, Bishop J, Degani E, et al (2018) Insect pollination as an agronomic input: Strategies for oilseed rape production. Journal of Applied Ecology 55:2834–2842. <https://doi.org/10.1111/1365-2664.13153>
- Garratt MPD, Coston DJ, Truslove CL, et al (2014) The identity of crop pollinators helps target conservation for improved ecosystem services. Biological Conservation 169:128–135. <https://doi.org/10.1016/j.biocon.2013.11.001>
- Gibson-Forty EVJ, Tielbörger K, Seifan M (2021) Equivocal evidence for a change in balance between selfing and pollinator-mediated reproduction in annual Brassicaceae growing along a rainfall gradient. Journal of Systematics and Evolution n/a: <https://doi.org/10.1111/jse.12637>
- Gómez JM (2000) Effectiveness of ants as pollinators of *Lobularia maritima*: effects on main sequential fitness components of the host plant. Oecologia 122:90–97. <https://doi.org/10.1007/pl00008840>
- Goswami V, Khan MS (2014) Impact of honey bee pollination on pod set of mustard (*Brassica juncea* L.: Cruciferae) at Pantnagar. The Bioscan 9:75–78
- Groeneveld JH, Klein A-M (2014) Pollination of two oil-producing plant species: camelina (*Camelina sativa* L. Crantz) and pennycress (*Thlaspi arvense* L.) double-cropping in Germany. GCB Bioenergy 6:242–251. <https://doi.org/10.1111/gcbb.12122>
- Hudewenz A, Pufal G, Bogeholz AL, Klein AM (2014) Cross-pollination benefits differ among oilseed rape varieties. Journal of Agricultural Science 152:770–778. <https://doi.org/10.1017/s0021859613000440>

- Jakhar P, Kumar Y, Ombir, et al (2014) Effect of different modes of pollination on quantitative and qualitative parameters of radish seed crop. *Trends in Biosciences* 7:4041–4044
- Jauker F, Bondarenko B, Becker HC, Steffan-Dewenter I (2012) Pollination efficiency of wild bees and hoverflies provided to oilseed rape. *Agricultural and Forest Entomology* 14:81–87. <https://doi.org/10.1111/j.1461-9563.2011.00541.x>
- Jauker F, Wolters V (2008) Hover flies are efficient pollinators of oilseed rape. *Oecologia* 156:819–823. <https://doi.org/10.1007/s00442-008-1034-x>
- Kamel SM, Mahfouz HM, Blal AE-FH, et al (2015) Diversity of insect pollinators with reference to their impact on yield production of canola (*Brassica napus* L.) in Ismailia, Egypt. *Pesticidi i fitomedicina* 30:161–168
- Kapila RK, Singh HB, Sharma JK, et al (2002) Effect of insect pollinators on seed yield and its quality in radish (*Raphanus sativus* L.). *Seed Research* 30:142–145
- Khan BM, Chaudhry MI (1995) Comparative assessment of honeybees and other insects with self-pollination of sarson (*Brassica campestris*) in Peshawar. In: Kevan PG (ed) *The Asiatic Hive Bee: Apiculture, Biology and Role in Sustainable Development in Tropical and Subtropical Asia*. Enviroquest Ltd., Ontario, Canada, pp 147–150
- Kumar J, Gupta JK, Mishra RC, Dogra GS (1988) Pollination studies in some cultivars of cauliflower (*Brassica oleracea* var. *botrytis* L.). *Indian Bee Journal* 50:93–95
- Lindström SAM, Herbertsson L, Rundlöf M, et al (2016) Large-scale pollination experiment demonstrates the importance of insect pollination in winter oilseed rape. *Oecologia* 180:759–769. <https://doi.org/10.1007/s00442-015-3517-x>
- Mahadik PB, Kulkarni SR, Manchare RR (2019) Impact of honey bees as a pollinators on seed production of mustard (*Brassica juncea* L.). *Journal of Entomology and Zoology Studies* 7:1380–1383
- Mahindru N, Singh G, Grewal GS (1998) Comparative abundance and foraging behaviour of insect pollinators of raya, *Brassica juncea* L. and role of *Apis mellifera* L. in crop pollination. *Journal of Insect Science* 11:34–37
- Maity A, Chakrabarty SK, Yadav JB (2014) Foraging behaviour of honeybees (*Apis* spp.) (Hymenoptera: Apidae) in hybrid seed production of Indian mustard (*Brassica juncea*). *Indian Journal of Agricultural Sciences* 84:1389–1394
- Mandal E, Amin MR, Rahman H, Akanda AM (2018) Abundance and foraging behavior of native insect pollinators and their effect on mustard (*Brassica juncea* L.). *Bangladesh Journal of Zoology* 46:117–123. <https://doi.org/10.3329/bjz.v46i2.39045>



- Manning R, Wallis IR (2005) Seed yields in canola (*Brassica napus* cv. Karoo) depend on the distance of plants from honeybee apiaries. *Australian Journal of Experimental Agriculture* 45:1307–1313. <https://doi.org/10.1071/EA02170>
- Marini L, Tamburini G, Petrucco-Toffolo E, et al (2015) Crop management modifies the benefits of insect pollination in oilseed rape. *Agriculture, Ecosystems & Environment* 207:61–66. <https://doi.org/10.1016/j.agee.2015.03.027>
- Mazzilli SR, Abbate S, Silva H, Mendoza Y (2020) *Apis mellifera* visitation enhances productivity in rapeseed. *Journal of Apicultural Research* 0:1–9. <https://doi.org/10.1080/00218839.2020.1856558>
- Mishra RC, Kumar J, Gupta JK (1988) The effect of mode of pollination on yield and oil potential of *Brassica campestris* L. var. sarson with observations on insect pollinators. *Journal of Apicultural Research* 27:186–189. <https://doi.org/10.1080/00218839.1988.11100800>
- Mussury RM, Fernandes WD (2000) Studies of the floral biology and reproductive system of *Brassica napus* L. (Cruciferae). *Brazilian Archives of Biology and Technology* 43:111–117
- Nagpal K, Yadav S, Kumar Y, Singh R (2017) Effect of pollination modes on yield components in Indian mustard (*Brassica juncea* L.). *Journal of Oilseed Brassica* 8:187–194
- Nedić N, Mačukanović-Jocić M, Rančić D, et al (2013) Melliferous potential of *Brassica napus* L. subsp. *napus* (Cruciferae). *Arthropod-Plant Interactions* 7:323–333. <https://doi.org/10.1007/s11829-013-9247-2>
- Partap U, Verma LR (1994) Pollination of radish by *Apis cerana*. *Journal of Apicultural Research* 33:237–241. <https://doi.org/10.1080/00218839.1994.11100877>
- Perrot T, Gaba S, Roncoroni M, et al (2018) Bees increase oilseed rape yield under real field conditions. *Agriculture, Ecosystems & Environment* 266:39–48. <https://doi.org/10.1016/j.agee.2018.07.020>
- Prasad D, Hameed SP, Singh R, Singh B (1989) Foraging behaviour of insect pollinators on brown mustard, *Brassica juncea* in Bihar, India. *Indian Bee Journal* 51:131–133
- Priti, Mishra RC, Sihag RC (2001) Role of insect pollination in seed production of radish (*Raphanus sativus* L.). *Seed Research* 29:231–234
- Pudasaini R, Thapa R, Poudel P (2014) Effect of pollination on qualitative characteristics of rapeseed (*Brassica campestris* L. var. toria) seed in Chitwan, Nepal. *International Journal of Biological, Food, Veterinary and Agricultural Engineering* 8:1278–1281

- Pudasaini R, Thapa RB (2014) Effect of pollination on rapeseed (*Brassica campestris* L. var. Toria) production in Chitwan, Nepal. *Journal of Agriculture and Environment* 15:41–45. <https://doi.org/10.3126/aej.v15i0.19814>
- Sabbahi R, De Oliveira D, Marceau J (2005) Influence of honey bee (Hymenoptera : Apidae) density on the production of canola (Crucifera : Brassicaceae). *Journal of Economic Entomology* 98:367–372
- Samnegård U, Hambäck PA, Lemessa D, et al (2016) A heterogeneous landscape does not guarantee high crop pollination. *Proceedings of the Royal Society B: Biological Sciences* 283:20161472. <https://doi.org/10.1098/rspb.2016.1472>
- Shakeel M, Inayatullah M (2013) Impact of insect pollinators on the yield of canola (*Brassica napus*) in Peshawar, Pakistan. *Journal of Agricultural and Urban Entomology* 29:1–5. <https://doi.org/10.3954/jaue12-07.1>
- Sharma D, Abrol DP (2014) Effect of insecticides on foraging behaviour and pollination role of *Apis mellifera* L. (Hymenoptera: Apidae) on toria (*Brassica campestris* var. toria) crop. *Egyptian Journal of Biology* 16:79–86. <https://doi.org/10.4314/ejb.v16i1.11>
- Sharma D, Abrol DP, Kumar M, et al (2013) Pollinator diversity and its impact on cauliflower (*Brassica campestris* var. *botrytis*) pollination. *Annals of Agri Bio Research* 18:383–385
- Sihag RC (1986) Insect pollination increases seed production in cruciferous and umbelliferous crops. *Journal of Apicultural Research* 25:121–126. <https://doi.org/10.1080/00218839.1986.11100704>
- Singh RP, Singh PN (1992) Impact of bee pollination on seed yield, carbohydrate composition and lipid composition of mustard seed. *Journal of Apicultural Research* 31:128–133. <https://doi.org/10.1080/00218839.1992.11101274>
- Stanley D, Gunning D, Stout J (2013) Pollinators and pollination of oilseed rape crops (*Brassica napus* L.) in Ireland: ecological and economic incentives for pollinator conservation. *J Insect Conserv* 17:1181–1189. <https://doi.org/10.1007/s10841-013-9599-z>
- Stanley J, Sah K, Subbanna ARNS (2017) How efficient is the Asian honey bee, *Apis cerana* in pollinating mustard, *Brassica campestris* var. toria? Pollination behavior, pollinator efficiency, pollinator requirements and impact of pollination. *Journal of Apicultural Research* 56:439–451. <https://doi.org/10.1080/00218839.2017.1329796>
- Steffan-Dewenter I (2003) Seed set of male-sterile and male-fertile oilseed rape (*Brassica napus*) in relation to pollinator density. *Apidologie* 34:227–235

- Stiles S, Lundgren J, Fenster C, Nottebrock H (2019) Maximizing ecosystem services provided to the new oil crop *Brassica carinata* through landscape and arthropod diversity. bioRxiv 724203. <https://doi.org/10.1101/724203>
- Stiles S, Lundgren JG, Fenster CB, Nottebrock H (2021) Maximizing ecosystem services to the oil crop *Brassica carinata* through landscape heterogeneity and arthropod diversity. *Ecosphere* 12:e03624. <https://doi.org/10.1002/ecs2.3624>
- Subedi N, Subedi IP (2019) Pollinator insects and their impact on crop yield of mustard in Kusma, Parbat, Nepal. *Journal of Institute of Science and Technology* 24:68–75
- Sutter L, Albrecht M (2016) Synergistic interactions of ecosystem services: Florivorous pest control boosts crop yield increase through insect pollination. *Proceedings of the Royal Society B: Biological Sciences* 283:1–8. <https://doi.org/10.1098/rspb.2015.2529>
- Tara JS, Sharma P (2010) Role of honeybees and other insects in enhancing the yield of *Brassica campestris* var. sarson. *Halteres* 1:35–37
- Tewari GN, Singh K (1983) Studies on insect pollinators in relation to seed production in cauliflower (*Brassica oleracea* var. *botrytis* L.). *Indian Bee Journal* 54–55
- Toivonen M, Herzon I, Rajanen H, et al (2019) Late flowering time enhances insect pollination of turnip rape. *Journal of Applied Ecology* 56:1164–1175. <https://doi.org/10.1111/1365-2664.13349>
- van Gils S, van der Putten WH, Kleijn D (2016) Can above-ground ecosystem services compensate for reduced fertilizer input and soil organic matter in annual crops? *Journal of Applied Ecology* 53:1186–1194. <https://doi.org/10.1111/1365-2664.12652>
- Varma SK, Joshi NK (1983) Studies on the role of honey bees in the pollination of cauliflower (*Brassica oleracea* var. *botrytis*). *Indian Bee Journal* 45:52–53
- Verma LR, Partap U (1994) Foraging behaviour of *Apis cerana* on cauliflower and cabbage and its impact on seed production. *Journal of Apicultural Research* 33:231–236. <https://doi.org/10.1080/00218839.1994.11100876>
- Verma SK, Phogat KPS (1994) Impact of pollination by honeybee (*Apis cerana indica*) on the yield gain of radish under valley conditions of Himalayan hills of U. P. (India). *Indian Bee Journal* 56:183–186
- Witter S, Nunes-Silva P, Lisboa BB, et al (2015) Stingless bees as alternative pollinators of canola. *Journal of Economic Entomology* 108:880–886. <https://doi.org/10.1093/jee/tov096>

Zou Y, Bianchi F, Jauker F, et al (2017a) Landscape effects on pollinator communities and pollination services in small-holder agroecosystems. *Agriculture Ecosystems & Environment* 246:109–116.  
<https://doi.org/10.1016/j.agee.2017.05.035>

Zou Y, Xiao H, Bianchi FJJA, et al (2017b) Wild pollinators enhance oilseed rape yield in small-holder farming systems in China. *BMC Ecology* 17:6.  
<https://doi.org/10.1186/s12898-017-0116-1>
